# Supplementary material for: Selected Ideal Natural Ligand Against TNBC by Inhibiting CDC20, Using Bioinformatics and Molecular Biology
Source: Research Square preprint supplement (doi:10.21203/rs.3.rs-770130/v1), 2021-08-10
Supplement: Supplementary file 2 [file a6a756ee503fef6ca7f3248f.docx]

Supplementary Table 4 Hydrogen bond interaction parameters and -related interaction parameters for each compound with the receptor CDC20

| Compound | Interaction Parameters | Donor Atom | Receptor Atom | Distances (Å) |
| --- | --- | --- | --- | --- |
| ZINC000004098930 | -interaction parameters | ILE216 | ZINC000004098930 | 4.90 |
| ZINC000004098930 | LEU176 | 5.06 |
| ZINC000004098930 | VAL200 | 4.11 |
| ZINC000008434966 | Hydrogen bond interaction | ZINC000008434966:H32 | ASP177:O | 2.55 |
| ZINC000008434966:H33 | ASP177:O | 2.48 |
| -interaction parameters | ZINC000008434966:C1 | ILE216 | 4.06 |
| TYR207 | ZINC000008434966:C1 | 4.48 |
| ZINC000008434966 | VAL200 | 1.60 |
| ZINC000008434966 | ILE216 | 4.69 |
